# Supplementary material for: Development of the smartphone-based colorimetry for multi-analyte sensing arrays
Source: Royal Society of Chemistry journal article supplement (doi:10.1039/c3lc51451j), 2014-01-01
Supplement: c3lc51451j1.pdf [file c3lc51451j1.pdf]

**Electronic Supplementary Information**

**Development of the Smartphone-based Colorimetry for Multi-analyte Sensing Arrays**

Jong Il Hong and Byoung-Yong Chang\*

This Electronic Supplementary Information contains the concentration table of the analytes and the matching percent of diagnosis results obtained by a commercial analyser and the smartphone app.

(3 page)

Table ESI-1. The concentration table of the analytes

| Analyte       | Negative<br>(-) | Positive       |                 |                  | Unit            |
|---------------|-----------------|----------------|-----------------|------------------|-----------------|
|               |                 | Level 1<br>(+) | Level 2<br>(++) | Level 3<br>(+++) |                 |
| RBC           | 0               | 10             | 50              | 250              | count / $\mu$ L |
| Bilirubin     | 0               | 0.5            | 1               | 3                | mg / dL         |
| Urobilinogen  | 0.1             | 1              | 4               | 8                | mg / dL         |
| Ketones       | 0 ~ 5           | 10             | 50              | 100              | mg / dL         |
| Protein       | 0~10            | 30             | 100             | 300              | mg / dL         |
| Nitrite       | 0               | found          |                 |                  |                 |
| Glucose       | 0 ~ 100         | 250            | 500             | 1000             | mg / dL         |
| Leucocyte     | 0               | 25             | 75              | 500              | count / $\mu$ L |
| Ascorbic acid | 0               | 10             | 25              | 50               | mg / dL         |

Table ESI-2. The table of matching percentage of diagnosis results obtained by a commercial analyser and the smartphone app.

| Analyte       | Negative (-) | Positive    |              |               | Unit             |
|---------------|--------------|-------------|--------------|---------------|------------------|
|               |              | Level 1 (+) | Level 2 (++) | Level 3 (+++) |                  |
| RBC           | 15 / 15      | 15 / 15     | 14 / 15      | 14 / 15       | matching / trial |
|               | 100          | 100         | 93           | 93            | %                |
| Bilirubin     | 15 / 15      | 19 / 21     | 20 / 21      | 20 / 22       | matching / trial |
|               | 100          | 90          | 95           | 91            | %                |
| Urobilinogen  | 15 / 15      | n/a         | n/a          | n/a           | matching / trial |
|               | 100          |             |              |               | %                |
| Ketones       | 15 / 15      | 15 / 15     | 12 / 15      | n/a           | matching / trial |
|               | 100          | 100         | 80           |               | %                |
| Protein       | 15 / 15      | 11 / 15     | 14 / 15      | 15 / 15       | matching / trial |
|               | 100          | 73          | 93           | 100           | %                |
| Nitrite       | 15 / 15      | 15 / 15     |              |               | matching / trial |
|               | 100          | 100         |              |               | %                |
| Glucose       | 15 / 15      | 15 / 15     | 12 / 15      | 13 / 18       | matching / trial |
|               | 100          | 100         | 80           | 72            | %                |
| Leucocyte     | 15 / 15      | 17 / 20     | 14 / 19      | 14 / 15       | matching / trial |
|               | 100          | 85          | 74           | 93            | %                |
| Ascorbic acid | 15 / 15      | 19 / 21     | 20 / 21      | 20 / 22       | matching / trial |
|               | 100          | 93          | 93           | 100           | %                |
